# Supplementary material for: Association between neutrophil-to-albumin ratio and mortality in patients with cardiogenic shock: a retrospective cohort study
Source: PubMed Central journal article supplement — BMJ Open. 2020 Oct 19;10(10):e039860. doi: 10.1136/bmjopen-2020-039860 (PMC7574943; doi:10.1136/bmjopen-2020-039860), 2020-10-19
Supplement: bmjopen-2020-039860supp001.pdf [file bmjopen-2020-039860supp001.pdf]

**Supplementary Table.** Subgroup analysis of the association between NAR and 90-day mortality.

|                                | N   | NAR stratification |                                |                                | P for interaction |
|--------------------------------|-----|--------------------|--------------------------------|--------------------------------|-------------------|
|                                |     | < 23.47            | 23.54 - 27.86                  | > 27.86                        |                   |
| <b>Vital signs</b>             |     |                    |                                |                                |                   |
| Heart rate, beats/min          |     |                    |                                |                                | 0.2793            |
| ≤ 87                           | 236 | 1.0                | 1.99 (1.16, 3.38) <sup>a</sup> | 2.89 (1.74, 4.80) <sup>c</sup> |                   |
| > 87                           | 237 | 1.0                | 1.15 (0.71, 1.84)              | 1.40 (0.88, 2.24)              |                   |
| SBP, mmHg                      |     |                    |                                |                                | 0.3579            |
| ≤ 104                          | 235 | 1.0                | 1.71 (1.03, 2.84) <sup>a</sup> | 1.81 (1.10, 2.98) <sup>a</sup> |                   |
| > 104                          | 237 | 1.0                | 1.32 (0.80, 2.17)              | 2.08 (1.26, 3.43) <sup>b</sup> |                   |
| DBP, mmHg                      |     |                    |                                |                                | 0.4170            |
| ≤ 58                           | 236 | 1.0                | 1.84 (1.11, 3.04) <sup>a</sup> | 2.54 (1.57, 4.12) <sup>c</sup> |                   |
| > 58                           | 236 | 1.0                | 1.33 (0.80, 2.21)              | 1.50 (0.91, 2.49)              |                   |
| MBP, mmHg                      |     |                    |                                |                                | 0.1870            |
| ≤ 73                           | 236 | 1.0                | 1.29 (0.79, 2.09)              | 1.61 (1.02, 2.53) <sup>a</sup> |                   |
| > 73                           | 237 | 1.0                | 1.98 (1.16, 3.38) <sup>a</sup> | 2.47 (1.46, 4.18) <sup>c</sup> |                   |
| Respiratory rate, beats/minute |     |                    |                                |                                | 0.8981            |
| ≤ 19                           | 236 | 1.0                | 1.55 (0.93, 2.59)              | 1.95 (1.19, 3.20) <sup>b</sup> |                   |
| > 19                           | 237 | 1.0                | 1.58 (0.97, 2.58)              | 2.10 (1.30, 3.40) <sup>b</sup> |                   |
| Temperature, °C                |     |                    |                                |                                | 0.1493            |
| ≤ 36.7                         | 231 | 1.0                | 1.35 (0.84, 2.18)              | 1.68 (1.05, 2.69) <sup>a</sup> |                   |
| > 36.7                         | 232 | 1.0                | 1.73 (1.01, 2.97) <sup>a</sup> | 2.57 (1.51, 4.37) <sup>c</sup> |                   |
| SPO <sub>2</sub> , %           |     |                    |                                |                                | 0.7774            |
| ≤ 97                           | 236 | 1.0                | 1.31 (0.81, 2.10)              | 1.71 (1.07, 2.73) <sup>a</sup> |                   |
| > 97                           | 237 | 1.0                | 1.93 (1.13, 3.31) <sup>a</sup> | 2.60 (1.54, 4.36) <sup>c</sup> |                   |
| <b>Laboratory parameters</b>   |     |                    |                                |                                |                   |
| Anion gap, mmol/l              |     |                    |                                |                                | 0.7581            |
| ≤ 13                           | 199 | 1.0                | 1.75 (0.94, 3.25)              | 1.52 (0.83, 2.79)              |                   |
| > 13                           | 276 | 1.0                | 1.44 (0.94, 2.22)              | 2.44 (1.60, 3.70) <sup>c</sup> |                   |
| Bicarbonate, mmol/l            |     |                    |                                |                                | 0.9570            |
| ≤ 18                           | 206 | 1.0                | 1.48 (0.88, 2.49)              | 1.98 (1.20, 3.25) <sup>b</sup> |                   |
| > 19                           | 269 | 1.0                | 1.50 (0.91, 2.46)              | 1.85 (1.14, 3.00) <sup>a</sup> |                   |
| Serum sodium, mmol/l           |     |                    |                                |                                | 0.0270            |
| ≤ 134                          | 192 | 1.0                | 1.11 (0.66, 1.88)              | 1.23 (0.74, 2.03)              |                   |
| > 134                          | 283 | 1.0                | 2.01 (1.24, 3.27) <sup>b</sup> | 2.90 (1.81, 4.67) <sup>c</sup> |                   |
| Serum potassium, mmol/l        |     |                    |                                |                                | 0.3218            |
| ≤ 3.6                          | 211 | 1.0                | 1.71 (0.94, 3.11)              | 1.94 (1.08, 3.46) <sup>a</sup> |                   |
| > 3.6                          | 264 | 1.0                | 1.44 (0.93, 2.24)              | 2.24 (1.45, 3.45) <sup>c</sup> |                   |
| Serum chloride, mmol/l         |     |                    |                                |                                | 0.0702            |
| ≤ 100                          | 206 | 1.0                | 1.59 (0.97, 2.61)              | 1.44 (0.86, 2.39)              |                   |

|                                    |     |     |                                |                                |        |
|------------------------------------|-----|-----|--------------------------------|--------------------------------|--------|
| > 100                              | 269 | 1.0 | 1.50 (0.91, 2.48)              | 2.56 (1.59, 4.12) <sup>c</sup> |        |
| Serum bilirubin, $\mu\text{mol/L}$ |     |     |                                |                                | 0.0343 |
| $\leq 0.5$                         | 192 | 1.0 | 1.91 (1.07, 3.42) <sup>a</sup> | 2.87 (1.63, 5.05) <sup>c</sup> |        |
| > 0.5                              | 239 | 1.0 | 1.46 (0.89, 2.37)              | 1.75 (1.08, 2.84) <sup>a</sup> |        |
| Serum glucose, mg/dl               |     |     |                                |                                | 0.7638 |
| $\leq 112$                         | 233 | 1.0 | 1.48 (0.90, 2.43)              | 1.59 (0.98, 2.60)              |        |
| > 112                              | 242 | 1.0 | 1.48 (0.88, 2.48)              | 2.25 (1.36, 3.72) <sup>b</sup> |        |
| SCr, mg/dl                         |     |     |                                |                                | 0.5793 |
| $\leq 1.2$                         | 236 | 1.0 | 1.85 (1.04, 3.31) <sup>a</sup> | 2.14 (1.20, 3.80) <sup>b</sup> |        |
| > 1.2                              | 239 | 1.0 | 1.45 (0.92, 2.28)              | 1.87 (1.22, 2.86) <sup>b</sup> |        |
| BUN, mg/dl                         |     |     |                                |                                | 0.5891 |
| $\leq 28$                          | 235 | 1.0 | 1.88 (1.07, 3.30) <sup>a</sup> | 1.78 (1.01, 3.16) <sup>a</sup> |        |
| > 28                               | 240 | 1.0 | 1.42 (0.89, 2.28)              | 2.15 (1.38, 3.33) <sup>c</sup> |        |
| Hematocrit, %                      |     |     |                                |                                | 0.2874 |
| $\leq 30$                          | 233 | 1.0 | 1.93 (1.09, 3.41) <sup>a</sup> | 1.95 (1.13, 3.39) <sup>a</sup> |        |
| > 30                               | 242 | 1.0 | 1.26 (0.80, 2.00)              | 2.78 (1.73, 4.47) <sup>c</sup> |        |
| Hemoglobin, g/dl                   |     |     |                                |                                | 0.1307 |
| $\leq 10$                          | 233 | 1.0 | 1.81 (1.03, 3.21) <sup>a</sup> | 1.96 (1.14, 3.38) <sup>a</sup> |        |
| > 10                               | 242 | 1.0 | 1.40 (0.88, 2.23)              | 2.90 (1.78, 4.71) <sup>c</sup> |        |
| Platelet count, $10^9/l$           |     |     |                                |                                | 0.2390 |
| $\leq 188$                         | 235 | 1.0 | 1.96 (1.20, 3.20) <sup>b</sup> | 2.22 (1.37, 3.60) <sup>b</sup> |        |
| > 188                              | 240 | 1.0 | 1.14 (0.68, 1.89)              | 1.77 (1.10, 2.87) <sup>a</sup> |        |
| WBC count, $10^9/l$                |     |     |                                |                                | 0.8677 |
| $\leq 10.7$                        | 234 | 1.0 | 1.31 (0.79, 2.15)              | 1.80 (1.12, 2.90) <sup>a</sup> |        |
| > 10.7                             | 241 | 1.0 | 1.80 (1.06, 3.04) <sup>a</sup> | 2.23 (1.33, 3.75) <sup>b</sup> |        |
| PTT, s                             |     |     |                                |                                | 0.9137 |
| $\leq 31.5$                        | 231 | 1.0 | 2.00 (1.19, 3.35) <sup>b</sup> | 2.03 (1.16, 3.56) <sup>a</sup> |        |
| > 31.5                             | 238 | 1.0 | 1.10 (0.67, 1.80)              | 1.62 (1.04, 2.53) <sup>a</sup> |        |
| PT, s                              |     |     |                                |                                | 0.3765 |
| $\leq 14.2$                        | 229 | 1.0 | 1.94 (1.11, 3.38) <sup>a</sup> | 2.93 (1.67, 5.14) <sup>c</sup> |        |
| > 14.2                             | 235 | 1.0 | 1.11 (0.69, 1.78)              | 1.30 (0.84, 2.03)              |        |
| INR                                |     |     |                                |                                | 0.5209 |
| $\leq 1.2$                         | 199 | 1.0 | 1.88 (1.03, 3.42) <sup>a</sup> | 2.58 (1.39, 4.81) <sup>b</sup> |        |
| > 1.2                              | 265 | 1.0 | 1.24 (0.79, 1.95)              | 1.56 (1.02, 2.39) <sup>a</sup> |        |
| <b>Comorbidities</b>               |     |     |                                |                                |        |
| CHD                                |     |     |                                |                                | 0.4651 |
| no                                 | 216 | 1.0 | 1.20 (0.71, 2.02)              | 1.68 (1.03, 2.73) <sup>a</sup> |        |
| yes                                | 259 | 1.0 | 1.87 (1.15, 3.01) <sup>a</sup> | 2.14 (1.31, 3.50) <sup>b</sup> |        |
| CHF                                |     |     |                                |                                | 0.8517 |
| no                                 | 298 | 1.0 | 1.59 (1.02, 2.46) <sup>a</sup> | 2.04 (1.33, 3.13) <sup>b</sup> |        |

|                              |     |     |                                |                                |        |
|------------------------------|-----|-----|--------------------------------|--------------------------------|--------|
| yes                          | 177 | 1.0 | 1.33 (0.74, 2.41)              | 1.81 (1.00, 3.28) <sup>a</sup> |        |
| <b>AF</b>                    |     |     |                                |                                | 0.3994 |
| no                           | 275 | 1.0 | 1.21 (0.74, 1.99)              | 1.93 (1.22, 3.04) <sup>b</sup> |        |
| yes                          | 200 | 1.0 | 1.87 (1.13, 3.10) <sup>a</sup> | 2.08 (1.25, 3.47) <sup>b</sup> |        |
| <b>Stroke</b>                |     |     |                                |                                | 0.0742 |
| no                           | 454 | 1.0 | 1.44 (1.01, 2.05) <sup>a</sup> | 1.85 (1.31, 2.61) <sup>c</sup> |        |
| yes                          | 21  | 1.0 | NA                             | NA                             |        |
| <b>Pneumonia</b>             |     |     |                                |                                | 0.7460 |
| no                           | 312 | 1.0 | 1.47 (0.96, 2.27)              | 2.15 (1.43, 3.24) <sup>c</sup> |        |
| yes                          | 163 | 1.0 | 1.58 (0.85, 2.94)              | 1.88 (0.99, 3.55)              |        |
| <b>Respiratory failure</b>   |     |     |                                |                                | 0.0102 |
| no                           | 240 | 1.0 | 1.73 (1.02, 2.95) <sup>a</sup> | 3.14 (1.89, 5.20) <sup>c</sup> |        |
| yes                          | 235 | 1.0 | 1.22 (0.76, 1.94)              | 1.19 (0.75, 1.90)              |        |
| <b>Chronic liver disease</b> |     |     |                                |                                | 0.3705 |
| no                           | 453 | 1.0 | 1.49 (1.04, 2.14) <sup>a</sup> | 1.98 (1.40, 2.81) <sup>c</sup> |        |
| yes                          | 22  | 1.0 | 0.50 (0.09, 2.75)              | 3.26 (0.66, 16.14)             |        |
| <b>Chronic renal disease</b> |     |     |                                |                                | 0.4300 |
| no                           | 375 | 1.0 | 1.69 (1.11, 2.57) <sup>a</sup> | 2.22 (1.47, 3.36) <sup>c</sup> |        |
| yes                          | 100 | 1.0 | 1.17 (0.60, 2.26)              | 1.47 (0.80, 2.73)              |        |
| <b>RRT</b>                   |     |     |                                |                                | 0.0044 |
| no                           | 402 | 1.0 | 1.42 (0.96, 2.11)              | 2.29 (1.58, 3.32) <sup>c</sup> |        |
| yes                          | 73  | 1.0 | 0.87 (0.36, 2.09)              | 0.45 (0.18, 1.11)              |        |
| <b>Malignancy</b>            |     |     |                                |                                | 0.3513 |
| no                           | 421 | 1.0 | 1.53 (1.05, 2.25) <sup>a</sup> | 2.15 (1.48, 3.12) <sup>c</sup> |        |
| yes                          | 54  | 1.0 | 1.58 (0.59, 4.26)              | 1.08 (0.41, 2.85)              |        |
| <b>Vasoactive drug</b>       |     |     |                                |                                | 0.3256 |
| no                           | 110 | 1.0 | 0.83 (0.35, 1.96)              | 1.78 (0.87, 3.64)              |        |
| yes                          | 365 | 1.0 | 1.63 (1.10, 2.42) <sup>a</sup> | 2.02 (1.36, 2.98) <sup>c</sup> |        |
| <b>Score systems</b>         |     |     |                                |                                |        |
| <b>SOFA</b>                  |     |     |                                |                                | 0.2866 |
| ≤ 6                          | 216 | 1.0 | 1.66 (0.94, 2.96)              | 2.47 (1.37, 4.46) <sup>b</sup> |        |
| > 7                          | 259 | 1.0 | 1.26 (0.80, 1.99)              | 1.46 (0.95, 2.24)              |        |
| <b>SAPSII</b>                |     |     |                                |                                | 0.1969 |
| ≤ 46                         | 231 | 1.0 | 1.56 (0.86, 2.82)              | 3.01 (1.67, 5.42) <sup>c</sup> |        |
| > 46                         | 244 | 1.0 | 1.49 (0.95, 2.34)              | 1.41 (0.92, 2.15)              |        |

NAR: neutrophil-albumin ratio; SBP: systolic blood pressure; DBP: diastolic blood pressure; MBP: mean blood pressure; SPO2: percutaneous oxygen saturation; BUN: blood urea nitrogen; SCr: Serum creatinine; WBC: white blood cell; PTT: partial thromboplastin time; PT: prothrombin time; INR: international normalized ratio; CAD: coronary heart disease; CHF: congestive heart failure; AF: atrial fibrillation; COPD: chronic obstructive pulmonary disease; ARDS: acute respiratory distress syndrome; RRT: renal replacement therapy; SOFA: Sequential Organ Failure Assessment;

---

SAPSII: Simplified Acute Physiology Score II.

P-value: <sup>a</sup>  $P < 0.05$ , <sup>b</sup>  $P < 0.01$ , <sup>c</sup>  $P < 0.001$
